# Supplementary material for: Constructing a comprehensive gene co-expression based interactome in Bos taurus
Source: PeerJ. 2017 Dec 4;5:e4107. doi: 10.7717/peerj.4107 (PMC5719962; doi:10.7717/peerj.4107)
Supplement: Table S1 [file peerj-05-4107-s002.xlsx]

## Sheet: TableS1_5000_exp_profile
	RPL37	TMSB10	RPLP0	RPL14	RPL11	JSP.1	RPL34	HSPB1	ACTG1	RPS2	CD74	RPL37A	RPL24	RPL28	TXNIP	ANXA2	HSPA8	ACTA2	EEF2	EEF1A1	SLC25A6	RPS20	VIM	TAGLN	DES	FAU	GSN	CD81	PPIB	S100A2	SPARCL1	PKM	PSAP	ATP5G3	APP	PDIA3	COL3A1	PRDX1	HSP90AA1	SSR2	TMBIM6	HSP90B1	BOLA-DRB3	SDHB	SEC61G	QSOX1	GNAS	LDHB	JCHAIN
LJA143	32095.6	1361.14	10698.5	3841.87	1405.46	3780.39	11378.9	337.039	1211.16	872.764	1278.47	3063.68	19090.3	5540.8	377.297	212.135	907.387	84.1821	1325.04	373.926	413.905	863.982	110.905	185.36	12.723	1644.01	182.243	458.398	708.059	546.09	279.833	349.392	367.259	208.567	300.617	357.784	58.2089	812.007	410.606	372.2	436.651	289.778	198.071	154.273	2361.02	211.196	1431.55	216.608	17.2128
LJA156	1197.85	546.298	2345.47	1018.74	1324.94	971.588	978.372	2330.87	679.472	2266.83	571.834	1286.41	944.487	2036.81	1052.06	136.857	1332.18	213.524	1506.29	141.853	168.953	605.75	448.353	348.546	11502.2	1111.05	480.906	436.969	164.994	282.129	157.429	6629.63	565.567	1369.83	103.359	123.412	93.7354	598.428	542.909	215.607	469.052	76.5707	128.404	1152.58	75.7092	22.7239	528.319	424.967	40.2501
LJA157	4004.8	1041.73	1610.73	2385.82	2274.62	954.244	1963.93	200.031	1693.61	1262.74	488.015	1538.6	1454.47	1305.19	818.216	1025.21	517.492	220.636	738.784	938.182	623.892	804.389	271.511	190.331	144.124	560.087	406.675	787.553	584.163	55.2391	159.412	405.625	372.541	509.11	713.927	1039.82	37.3917	518.179	233.786	968.76	893.394	496.149	165.606	344.471	661.164	499.72	482.019	258.728	1340.12
LJA158	3580.15	860.193	2161.92	1860.9	1936.58	672.878	1901.33	838.961	1793.91	1804.47	1263.66	1849	1180.38	1249.9	499.117	496.087	392.139	6184.06	1609.97	887.238	1312.56	625.984	1017.23	6559.32	4803.08	919.791	1209.68	1691.73	568.445	325.753	615.521	451.997	771.964	216.015	639.916	320.052	399.091	455.416	272.889	416.248	386.03	146.481	192.759	130.033	325.63	206.925	420.32	132.327	105.541
LJA162	3626.31	3537.8	2731.8	1426.29	1707.1	1494.38	1633.42	259.266	1997.3	1600.75	1064.73	1899.65	1380.19	676.616	234.312	361.28	676.567	926.854	767.983	887.497	588.822	488.988	289.583	348.147	203.413	613.775	420.697	564.352	812.106	320.587	164.602	446.738	847.943	262.259	383.343	1394.18	26.3249	649.021	219.066	462.186	673.123	1268.86	300.804	136.262	1425.83	1336.54	308.167	181.241	315.913
LJA163	3024.64	638.215	1543.57	1430.08	1397.22	1934.14	1381.38	96.9617	1196.8	1000.16	563.181	1570.02	1240.92	408.761	96.9356	167.278	672.949	574.739	361.05	401.057	237.472	504.752	105.919	341.453	159.6	461.724	79.0023	582.771	919.985	85.9236	129.549	525.161	587.658	316.776	340.633	1675.06	24.2381	454.315	251.35	597.117	841.307	1560.69	200.748	158.268	2197.71	672.55	492.005	174.668	123.344
LJA166	2229.62	578.21	81.1581	141.002	180.603	295.301	352.078	111.047	82.8866	491.412	743.786	158.537	209.805	237.976	27.355	61.5621	35.3539	66.4467	24.373	330.863	63.3327	531.672	220.416	158.77	428.415	1369.26	180.187	154.165	318.079	597.219	30.1344	140.255	30.099	442.767	150.79	125.692	33.7319	105.564	155.468	577.787	56.4527	224.937	67.9523	189.392	1702.8	31.4518	35.0125	201.223	1158.76
LJA167	1659.96	1427.51	1262.86	639.104	786.374	185.568	848.693	160.622	952.833	875.661	226.049	905.671	790.733	656.428	134.014	94.593	593.047	716.901	453.372	328.72	155.087	360.467	480.668	354.912	117.192	366.747	130.253	207.243	326.336	23.678	149.459	173.799	555.065	212.063	163.369	842.085	62.6447	485.769	891.932	206.887	202.867	1022.14	81.202	274.051	575.386	45.9308	142.392	109.729	30.5964
LJA168-LJA222	4876.26	1984.4	2825.16	2317.19	2181.15	697.803	1988.87	266.853	1095	1640.56	1009.55	1893.43	1900.46	1257.97	146.562	94.3746	694.352	144.822	636.238	633.302	725.823	1001.92	737.868	91.8402	20.1014	859.91	73.9352	478.135	1144.37	7.32047	409.526	170.414	456.776	250.827	473.454	688.358	392.095	388.453	449.072	405.905	266.313	776.354	304.224	120.566	449.54	76.3289	468.831	255.803	6.23915
LJA201	4124.41	888.124	4477.22	2536.11	3565.74	390.838	1675.71	843.374	1638.07	2463.13	507.743	2101.14	2021.14	1492.76	203.759	1249.07	2009.78	88.564	925.022	697.614	973.381	1132.32	497.672	108.409	939.991	794.217	349.575	302.947	385.246	7316.81	69.683	591.871	194.049	522.559	143.133	236.291	133.922	602.887	363.659	244.236	267.229	355.725	182.343	256.895	366.264	271.845	330.66	167.901	75.5423
LJA202	5263.36	2263.62	2415.58	2176.26	2233.93	1530.19	2308.75	4167.56	655.658	2117.11	552.254	2700.5	3250.11	1447.25	646.848	401.163	1053.84	347.617	792.113	143.013	213	973.67	1129.84	424.999	8696.76	1236.52	751.211	401.547	323.822	1369.85	316.805	1048.92	250.597	3038.65	136.349	146.81	81.8231	775.46	685.516	248.229	207.631	122.696	286.314	1485.33	722.45	39.5833	355.486	1158.04	15.5551
LJA203	4905.89	2126.07	4864.01	3091.5	3430.11	3144.66	2273.17	313.544	1648.12	2258.39	2169.5	2041.74	2159.26	2099.49	340.109	1074.56	611.684	852.646	882.654	547.017	1411.54	1391.05	642.152	701.752	208.522	1740.97	680.653	944.441	1070.15	5823.65	198.685	519.078	610.259	409.956	222.919	578.738	102.201	720.024	180.824	679.622	439.071	377.988	412.051	276.771	665.817	496.775	248.381	156.526	5231.6
LJA204a	2596.52	1243.77	2650.56	2212.04	2239.25	1365.85	1144.89	3546.06	713.23	1813.23	1500.58	1423.04	1638.19	2745.04	535.902	590.302	813.348	503.179	1527.52	96.277	426.463	853.91	2232.55	581.667	17649.5	919.778	2296.42	750.619	482.765	466.887	197.807	2194.53	609.016	683.38	185.128	138.401	174.809	608.205	418.335	372.026	212.045	180.464	173.217	1138.63	476.863	112.299	327.334	1113.04	8.83256
LJA204b	3056.32	1093.12	1834.05	2112.95	1781.2	303.697	1420.34	739.76	2282.38	1354.45	224.104	1399.8	1206.61	652.39	640.751	430.187	716.265	13251.2	1310.75	791.492	570.736	593.843	2967.71	7129.59	2858.72	629.921	1180.18	899.457	497.239	3.95129	1435.93	349.323	284.439	209.11	318.944	285.482	621.929	256.476	469.032	417.604	298.675	229.438	82.8822	103.945	348.427	146.165	414.952	183.139	9.07812
LJA205	4672.21	4290.11	2040.56	2009.43	2506.57	3263.41	1829.64	281.202	1077.52	1509.02	2635.39	1524.82	1036.27	878.324	760.285	209.993	1008.38	319.353	494.458	616.883	595.445	875.801	483.61	322.808	89.152	954.101	281.397	386.537	590.917	3.84016	134.724	166.933	487.027	206.153	147.056	433.083	115.53	286.285	348.095	393.916	262.485	778.617	894.126	98.997	381.074	76.031	214.353	116.11	4355.88
LJA206	2061.58	383.172	1440.15	1780.17	1609.13	645.737	1436.93	277.695	1606.86	1027.06	577.973	1678.76	892.694	725.438	237.79	199.82	1467.79	33.2969	783.879	592.278	437.777	581.705	109.308	54.0556	5.54592	700.194	42.9064	534.059	553.507	217.192	277.708	463.833	332.918	239.563	214.964	452.15	20.0188	296.874	621.775	357.513	298.791	382.132	173.215	135.899	575.815	109.783	1424.12	74.9337	19.1002
LJA207	2089.75	705.249	1135.7	1423.82	1386.84	773.416	1290.44	321.111	1294.01	886.58	1218.31	1284.78	771.027	755.785	410.676	293.481	1005.07	61.1058	595.167	451.648	421.845	519.308	469.707	117.662	14.721	691.93	141.389	583.307	549.739	196.626	708.432	458.047	405.697	278.386	377.444	397.946	49.8075	294.612	504.546	352.537	354.804	327.585	341.829	174.372	470.741	94.4757	2027.51	147.374	24.7442
LJA209a	3139.52	1100.43	2089.51	1680.39	2006.15	513.793	1476.44	236.52	1015.01	1257.58	161.68	1354.03	937.236	730.83	469.338	515.021	739.165	354.264	820.669	664.808	717.011	632.093	141.924	243.795	5.86244	905.292	253.299	905.616	558.651	169.871	30.8448	163.545	501.531	279.229	481.879	640.627	52.2978	177.362	306.802	597.154	618.601	353.734	53.7169	290.947	448.373	418.914	772.134	141.468	7089.43
LJA212	2486.61	635.322	1302.48	1610.53	1524.6	879.53	1284.79	341.513	990.826	1113.5	604.664	1309.27	935.243	621.008	352.61	223.668	1086.76	260.242	628.255	568.126	451.941	541.59	802.291	264.568	52.8905	661.576	118.162	585.47	681.992	122.222	369.176	439.027	648.949	326.746	457.981	694.715	51.7995	418.213	470.69	381.658	352.48	509.982	219.86	292.536	345.51	124.708	1043.54	228.727	9.14152
LJA215	1771.57	1201.04	1410.25	880.412	763.495	1147.72	696.109	883.446	2006.22	1086.59	1319.46	966.71	661.665	754.934	618.766	267.26	317.287	2255.84	1100.85	550.82	821.755	522.013	3666.32	1298.9	479.18	564.327	815.721	1037.81	391.572	37.6774	425.325	574.156	958.583	221.65	1440.73	278.948	249.313	345.572	230.686	361.192	380.053	129.019	308.506	156.404	258.603	206.868	713.616	136.882	45.3553
LJA217	1851.52	942.32	947.07	951.896	1088.21	425.177	875.239	344.544	1367.95	1755.35	947.147	1041.1	672.654	1219.36	105.725	42.6932	954.499	38.0353	696.844	229.957	548.507	306.316	193.542	71.5692	18.0929	827.592	126.632	733.175	500.28	3.18592	1664.7	743.53	1000.41	329.103	648.887	169.386	6.61302	388.005	701.501	275.202	444.501	221.691	201.368	393.777	235.269	28.1875	629.245	356.919	1.73855
LJA218	347.624	440.758	359.745	523.836	561.595	176.889	348.431	135.696	913.182	583.243	174.175	502.006	368.887	380.039	55.5785	28.0963	1083.92	89.6651	338.177	66.3663	229.684	127.047	157.053	92.8241	32.8043	362.761	52.7202	334.831	243.806	3.17161	1560.22	542.726	466.642	371.274	361.132	127.729	8.86582	174.626	606.013	67.8115	234.211	173.641	70.8573	315.46	170.434	13.8397	1653.72	429.44	2.50365
LJA219	2093.02	987.017	738.988	1037.55	1101.32	387.899	1037.09	268.292	1291.48	1225.48	558.8	1078.94	727.499	862.677	104.012	47.1099	1146.87	134.28	540.921	195.744	363.575	269.992	237.567	165.83	44.8472	789.711	94.794	601.793	393.896	4.62057	2208.85	701.438	661.174	433.08	639.741	179.515	9.03931	300.26	740.833	207.953	330.948	247.201	135.64	414.678	307.08	18.8918	734.664	519.413	14.4664
LJA220	2039.83	857.997	907.747	1013.9	973.242	349.566	954.538	440.151	1499.74	1594.37	958.124	1092.24	622.652	982.391	131.389	38.4636	839.18	100.051	691.519	296.371	400.645	317.356	248.87	127.984	31.2681	818.838	101.447	785.189	411.663	6.66319	2252.44	590.334	804.253	344.151	530.227	199.127	9.22049	351.568	580.5	278.576	548.122	224.769	219.862	351.823	300.171	24.739	798.178	294.101	2.42405
LJA224	5506.6	6930.88	2559.52	3040.89	2960.62	1646.6	3963.21	1272.36	1218.99	1352.67	3930.28	3354.85	2810.64	4191.72	258.636	207.094	826.73	277.545	588.702	178.852	376.146	1026.41	315.725	435.801	132.024	2284.38	425.191	511.135	1165.28	227.378	467.553	441.101	1069.01	338.97	247.238	160.031	6.57	1013.34	613.584	547.841	344.612	268.852	472.483	381.734	628.195	57.2397	190.787	659.945	38.8706
LJA228	2255.18	674.447	1621.28	1329.81	1199.5	710.637	1184.62	516.424	814.934	1618.72	568.138	1304.81	749.178	506.91	433.962	206.829	1418.54	233.444	499.626	565.363	640.199	321.184	218.73	144.983	30.4979	526.434	69.3675	359.038	663.628	1067.48	31.9007	144.261	984.258	766.705	526.374	282.827	87.1649	365.659	389.109	224.923	952.66	399.767	223.354	578.442	238.375	69.3472	634.03	590.355	231.975
LJA229	2456.11	773.073	1771.01	1468.07	1317.36	911.111	1252.16	647.68	944.889	1755.02	632.575	1508.29	896.453	620.394	507.389	219.076	1286.49	268.843	511.167	565.33	704.747	437.91	265.132	194.552	41.9842	674.1	75.5269	424.252	703.631	1299.93	40.8723	167.896	888.721	841.45	468.258	249.819	69.16	396.602	366.749	261.283	861.098	311.159	213.431	634.982	301.875	73.1065	783.32	659.726	183.19
LJA230	5953.47	6324.03	2934.69	2380.04	3088.36	3856.32	2459.75	326.82	1421.94	2404.66	4749.7	2183.93	1334.82	1210.04	555.621	144.944	993.842	112.193	570.329	686.732	880.37	1339.68	564.208	171.902	42.12	1414.1	193.602	484.947	643.478	1.9992	53.7775	199.934	600.539	217.996	120.515	365.982	68.4472	368.112	276.655	418.605	289.63	465.076	1476.88	123.815	294.27	66.4158	202.326	134.642	2664.78
LJA232a	5153.08	4138.8	3527.25	2496.45	3504.27	1743.77	2010.29	1143.49	1616.1	2045.51	1559.69	2017.12	1586.64	1595.69	1109.87	1784.71	207.857	1067.63	1066.61	599.371	1120.22	1043.69	5457.02	1124.13	563.605	1476.31	3733.71	1301.61	1044.58	121.217	122.119	310.697	600.682	293.742	203.738	265.639	437.044	302.892	145.425	475.76	344.595	100.322	256.118	203.941	314.651	163.209	493.952	300.33	110.919
LJA233	5201	3118.15	3314.76	2907.55	2752.99	1273.55	2219.97	1420.52	1816.76	2304.69	1102.38	2254.92	1794.71	1516.14	998.298	1059.63	781.839	3195.07	1128.06	777.485	1002.01	1137.66	2458.17	1908.35	1113.26	1029.48	940.359	943.772	684.018	4466.68	287.788	245.865	451.752	287.334	430.728	316.288	358.733	441.717	367.761	603.448	426.844	175.244	334.758	205.722	389.417	388.661	336.335	403.187	236.411
LJA234b	1959.44	6968.38	1590.36	1078.19	1061.6	3378.25	845.315	1004.3	1426.66	874.123	2960.51	745.778	598.158	548.629	1608.91	513.338	1241.15	632.687	481.674	469.426	423.355	319.177	1081.76	509.11	278.769	502.203	734.252	585.168	340.883	271.669	345.381	191.185	1475.75	155.917	596.006	385.036	212.162	311.843	606.825	255.019	541.544	222.194	1053.16	117.946	215.783	129.357	289.724	107.573	313.691
LJA235	1330.59	1135.47	1008.99	774.838	788.026	923.591	663.806	2782.99	544.386	1396.92	931.177	738.594	750.046	438.645	779.201	228.529	1181.85	155.964	785.835	129.987	168.873	325.319	703.563	180.537	6486.05	422.778	471.791	512.621	228.921	654.095	475.002	510.495	380.196	2195.2	663.801	187.31	524.815	442.969	537.287	181.138	178.518	531.239	324.058	861.327	354.431	62.9655	438.082	1531.61	7.84743
LJA236	2063.92	1493.29	1234.83	1069.98	1096.38	1626.18	871.273	1376.9	816.979	1507.35	1075.71	1026.45	965.382	620.208	908.431	259.828	976.107	402.871	929.047	382.15	235.231	427.55	1029.02	432.991	5002.63	454.399	660.233	594.16	349.257	166.902	849.229	420.731	352.653	1566.6	448.667	239.004	208.3	424.413	419.305	200.72	204.337	315.046	376.313	814.104	363.603	68.9989	378.136	987.501	18.3426
LJA237	3222.83	1796.76	1829.71	2208.86	1909.19	488.809	1507.2	767.18	2106.06	1448.89	369.875	1399.2	1466.1	778.029	744.355	474.647	712.543	12468.8	1046.87	609.196	628.955	705.563	2786.32	7257.17	2573.7	798.399	1065.61	912.086	607.177	12.1225	1150.69	350.242	337.232	230.804	265.675	289.637	642.539	292.211	398.102	422.96	270.068	221.398	127.57	134.207	502.093	143.695	465.848	220.873	26.1479
LJA239	3955.2	579.284	3739.02	2447.26	2472.36	240.608	1533.77	1674.08	3008.53	2544.92	261.916	2050.12	1831.46	1245.55	404.526	981.177	1230.79	748.079	959.501	946.376	1149.05	803.041	371.669	913.946	1229.94	590.234	385.333	400.537	389.321	3872.4	110.961	363.533	174.249	441.783	172.146	235.48	159.879	574.398	353.43	237.77	302.338	263.602	78.3462	234.099	328.071	418.056	313.752	97.0512	20.6266
LJA240	2543.32	1747.47	1488.77	1494.08	942.012	2301.09	1029.5	797.665	735.31	1578.16	1398.24	1454.84	812.418	767.196	537.874	263.243	1161.69	261.257	787.46	593.575	373.479	478.738	267.151	105.824	31.5864	484.746	56.9651	1111.21	1047.6	706.029	157.785	54.83	1044.55	333.789	109.479	765.548	407.735	113.597	440.978	408.707	1466.58	1154.75	561.254	236.436	473.205	200.438	234.246	256.46	134.178
LJA241	2933.49	4313.67	2634.64	1313.2	1771.97	361.526	1169.07	389.126	1061.52	1398.78	219.036	1116.46	1207.97	807.259	125.414	969.164	1566.78	287.246	796.934	658.258	791.076	572.668	2041.23	314.587	9.74085	566.485	86.5192	273.975	846.247	40.25	122.344	933.015	617.88	1005.99	224.355	654.437	2812.75	469.52	527.33	334.219	212.251	601.024	99.8093	266.305	692.567	113.934	369.222	342.63	5.90064
LJA243	3007.24	4150.48	2514.57	1366.36	1746.65	321.77	1247.08	259.692	1058.58	1262.45	191.787	1054.02	1314.05	714.141	134.541	1003.89	1679.58	329.711	713.81	686.786	630.004	578.186	2019.6	272.61	9.05483	526.014	74.7238	248.937	834.425	35.3669	134.728	867.753	559.533	1023.07	235.516	709.32	2640.36	498.409	562.459	331.435	223.392	657.856	96.6561	263.281	764.18	102.391	374.198	379.036	6.30907
LJA244	1668.29	700.078	1469.14	779.467	964.529	1085.76	812.882	2051.36	458.895	1673.72	630.351	1112.72	1128.43	912.947	1616.67	145.951	1017.25	106.224	1199.46	94.0869	156.293	364.604	429.196	134.357	8562.1	533.547	377.359	470.465	116.947	113.37	217.803	902.802	329.914	1595.98	162.883	117.212	120.293	637.315	489.847	147.489	291.022	88.1332	183.047	1285.05	334.987	25.1798	477.471	1010.75	13.7569
LJA248	3059.3	1140.17	1818.31	1560.99	1505.09	801.771	1163.85	471.728	1401.23	1394.65	448.537	866.82	983.745	540.203	726.558	637.091	695.313	419.098	723.926	697.571	474.978	466.948	742.127	271.909	77.871	672.098	253.943	657.498	565.449	197.785	618.206	187.148	262.861	221.63	323.276	361.881	3498.89	287.559	360.47	377.546	302.317	238.073	142.302	112.729	409.979	59.4142	331.339	188.149	648.301
LJA249	2851.3	1029.57	1764.18	1436.33	1489.08	841.385	1140.3	289.705	1167.87	1335.9	387.766	936.496	981.693	504.482	709.775	607.053	736.833	323.87	662.974	657.948	455.476	493.68	564.368	160.321	54.9449	633.311	186.64	574.261	563.426	104.69	714.967	177.842	237.307	235.396	296.935	417.333	2872.96	343.029	352.392	360.628	336.728	247.034	135.804	119.873	454.979	50.8312	311.633	199.396	1068.15
LJA250a	3736.8	1049.41	2195.57	1624.12	1620.67	891.976	1189.7	441.986	1552.24	1879.14	500.632	1140.27	951.862	695.883	651.169	727.414	769.216	412.302	817.183	776.049	619.466	499.171	793.414	197.448	63.6034	686.254	224.113	671.014	617.679	193.902	712.28	204.707	305.553	275.795	321.307	464.271	3560.21	412.109	355.994	395.7	368.107	271.501	177.579	132.335	492.968	70.2261	347.91	228.795	805.712
LJA251	3486.84	837.842	2674.67	1934.65	1834.22	1351.1	1532.39	422.193	1156.53	1636.46	527.938	1576.02	1121.29	804.762	887.522	673.034	861.333	940.947	1280.93	1038.26	678.867	699.969	370.935	735.372	529.812	583.17	423.75	903.934	389.075	229.075	410.141	168.859	438.227	166.679	213.583	357.859	253.708	267.782	582.13	429.41	663.607	271.525	166.415	95.3923	247.005	168.377	285.969	129.573	422.108
LJA252a	4591.94	999.872	3250.6	2386.4	2277.13	1661.94	1957.27	460.384	1146.83	1912.91	482.783	1791.09	1480.01	1086.47	685.652	655.312	923.414	897.891	1282.56	1050.92	742.622	1036.83	336.201	761.895	422.38	909.769	323.608	913.479	671.504	175.827	260.831	179.249	469.935	217.082	171.114	625.488	301.987	300.508	493.322	611.309	666.794	718.635	145.66	108.869	360.271	204.95	308.468	136.37	928.962
LJA253	13793.8	4078.14	6361.78	8459.79	7044.68	1376.02	6283.47	1924.61	1610.11	4103.73	1089.74	5296.08	5450.82	3889.27	544.632	885.953	581.779	5667.18	1300.08	422.693	1348.71	2976.3	602.901	6680.06	1910.21	3434.33	1088.86	845.035	2240.63	763.687	209.952	217.799	334.968	269.64	120.821	267.43	324.908	529.049	301.049	1391.45	229.569	200.576	172.512	315.599	1179.74	79.4042	97.9244	483.465	697.719
LJA254	4759.71	1148.59	2532.92	2635.48	2444.64	1131.46	2035.78	854.636	1237.95	1927.24	631.753	1834.24	1619.22	901.36	987.247	512.814	655.558	2552.96	1355.95	975.815	762.391	947.524	915.765	2135.54	1206.93	845.173	941.359	1004.52	555.412	77.8951	719.731	182.323	379.094	173.332	361.737	284.19	709.168	188.697	392.329	540.088	378.635	151.807	185.807	114.737	256.048	108.824	362.335	162.602	336.181
LJA255	3203.11	884.151	2913.29	1623.42	1562.4	2104.4	1394.58	529.147	849.842	1283.04	1852.45	1450.92	1005.11	1010.75	1045.64	1040.23	967.708	189.395	843.072	749.677	626.921	779.774	187.913	204.477	77.1878	760.189	432.088	968.797	366.715	362.088	82.4631	220.199	295.356	195.382	164.864	391.698	136.744	279.894	762.908	357.763	501.114	223.433	461.423	101.346	285.434	103.656	258.979	112.913	167.108
LJA256	4602.66	990.012	3976.02	2230.69	2147.68	1515.23	1890.39	556.473	989.695	1808.11	816.26	1760.19	1405.37	1270.44	698.095	808.254	817.745	411.009	1219.62	960.356	708.458	951.622	372.4	330.162	151.574	811.509	403.58	1038.76	673.744	198.931	111.821	181.983	388.324	204.799	158.067	617.309	298.596	294.683	525.275	575.484	502.943	431.358	232.295	103.442	400.693	170.513	282.121	118.382	443.532
LJA257	5916.96	2486.94	3257.25	2922.33	3253.11	419.789	2585.78	1020.88	1689.13	2840.4	349.502	1858.52	1954.16	1028.02	465.006	352.473	611.986	6864.86	1024.72	1112.29	571.723	1246.6	655.836	6111.1	1164.07	1122.91	709.841	1012.57	861.44	6.4994	764.456	179.117	210.508	226.148	271.935	236.926	1479.85	192.702	357.912	551.701	224.415	155.202	124.516	130.048	252.843	50.3487	390.35	211.28	99.7144
LJA258	5598.03	2721.49	3595.91	3107.75	2621.68	2849.04	2206.13	646.702	1535.64	2257.86	578.401	1850.54	1909.77	1317.05	641.565	1003.95	724.007	550.74	878.42	924.158	723.091	987.863	1636.83	602.787	100.125	1017.76	456.957	918.223	1014.68	260.683	203.13	267.138	633.653	320.334	460.329	536.024	3776.26	328.034	321.137	588.38	329.734	359.238	181.481	206.805	500.068	315.074	382.397	217.376	157.027
LJA259	4191.75	1610.78	2834.59	2596.28	2275.56	3049.3	1896.05	406.809	1425.19	1638.48	516.936	1436.58	1451.41	1052.55	695.932	1216.47	739.924	361.624	863.254	873.288	659.714	853.34	1221.67	339.36	169.2	893.422	681.201	985.558	767.317	767.179	231.93	237.744	571.591	263.344	498.093	424.705	4844.35	257.702	309.206	492.872	319.756	329.703	144.633	122.945	479.137	452.595	384.974	139.28	1278.37
LJA260	4634.35	2964.4	2038.81	2689.2	2267.07	1634.61	2113.77	1716.11	1913.77	1461.81	1260.94	1601.25	1525.84	861.955	695.025	858.599	1028.84	3009.56	906.116	739.628	683.806	814.399	2255.57	2847.68	1328.89	1010.82	2322.13	868.238	674.852	67.3677	419.51	285.247	414.91	206.671	351.332	395.207	1068.91	229.626	454.589	468.423	259.891	227.671	402.281	130.709	393.971	184.248	395.921	141.385	323.812
LJA261	4246.91	2857.18	2928.1	2627.23	2480.41	1708.8	1880.39	692.112	1176.18	2019.31	1050.16	1663.76	1362.57	941.911	749.987	560.791	590.028	1066.99	1157.02	871.76	1020.79	710.747	973.33	2034.88	1361.12	992.033	390.537	800.559	702.422	283.359	580.897	224.507	563.609	256.073	560.01	678.019	636.111	321.851	214.548	524.119	423.569	292.228	309.312	165.987	316.842	342.068	359.529	166.069	861.672
LJA262	4281.89	1296.04	2260.58	2844.04	2451.44	987.562	2040.48	828.317	1482.39	1585.46	724.2	1791.29	1404.9	822.927	947.03	595.408	904.109	2862.75	883.131	776.911	597.572	822.645	814.799	3326.09	2162.83	887.127	465.065	726.632	568.62	4218.75	839.021	252.632	307.564	265.066	515.801	377.307	491.697	386.116	389.754	475.894	305.613	247.29	294.776	146.206	278.369	244.282	362.598	207.831	1656.74
LJA263	4066.9	1756.36	2105.31	2099.59	2432.76	2420.49	1761.43	203.622	1078.82	1666.36	2068.78	1458.29	1148.5	904.289	1032.61	749.951	485.254	399.857	640.232	723.669	451.631	741.071	499.426	480.288	54.3466	829.615	495.79	711.698	415.669	546.267	67.4311	162.37	298.754	164.258	291.794	304.118	254.903	267.743	213.155	350.31	467.562	183.777	551.581	95.8867	266.497	176.169	287.506	101.254	381.993
LJA264	1580.53	341.4	1740.41	828.85	987.861	523.13	822.821	1111.48	374.301	1879.51	355.304	1176.73	1118.56	859.685	840.489	101.976	1479.84	72.8036	989.119	65.3981	99.2758	472.259	212.762	101.464	6610.77	543.206	238.465	505.196	91.9807	331.687	136.176	6854.14	216.989	1314.89	76.8017	99.0389	72.215	539.878	476.435	120.664	739.078	81.3526	106.781	1179.73	350.664	13.6894	382.439	262.61	11.244
LJA265	1807.23	407.201	1508.88	849.522	1075.67	512.358	894.807	1363.35	349.146	1593.46	275.593	1187.76	1172.75	898.408	811.053	105.005	1549.14	81.8301	891.17	84.8268	103.258	395.32	315.519	137.242	5889.24	597.216	310.934	435.163	108.68	286.369	112.148	6655.38	265.695	920.588	85.1657	110.542	84.838	448.914	533.021	138.078	796.578	99.1253	106.036	999.222	417.742	16.1319	330.495	132.505	6.84954
LJA266	1368.83	574.113	1810.27	835.376	954.457	554.998	860.688	1599.78	476.19	2016.99	353.96	1154.31	887.495	1043.2	1062.98	194.791	2217.54	118.251	1049.51	103.731	118.553	435.385	411.47	269.715	8704.18	541.128	331.117	499.263	157.235	157.861	107.77	7598.6	358.567	988.856	97.1545	139.899	82.0144	535.879	671.652	66.6797	783.825	85.4637	129.144	1218.29	501.406	20.1662	564.94	145.639	10.6675
LJA267a	1224.01	414.731	1396.24	771.469	999.797	670.402	910.344	1504.44	414.727	1818.75	370.804	1145.47	1146.86	979.108	860.249	94.1243	1538.86	118.303	1205.44	63.8543	117.101	445.197	235.859	124.926	7046.23	580.641	237.424	426.601	73.5476	149.011	144.602	8814.92	240.221	1479.88	87.3162	88.993	53.1982	471.28	558.574	118.154	634.077	99.9404	90.6118	1380.97	422.012	14.5336	316.395	224.793	17.3838
LJA268	2013.45	444.703	1723.9	928.102	1300.25	679.61	1062.73	3739.56	433.533	1623.23	302.892	1528.25	1335.06	1125.15	858.347	119.255	1578.56	179.294	1142.42	187.618	102.492	553.224	321.496	196.218	9405.1	522.911	303.12	249.107	113.735	31.0223	163.421	973.733	281.611	1053.96	106.444	94.3277	86.8834	571.246	892.222	158.284	203.907	133.32	100.222	1147.47	270.914	15.791	342.679	692.215	6.06274
LJA270	1582.73	446.934	1254	908.317	951.83	508.867	872.252	996.605	516.821	1516.67	268.583	1082.64	1183.76	881.178	907.338	158.474	1394.72	321.958	905.808	119.435	87.7728	381.644	475.129	309.445	6271.95	436.198	299.527	393.809	102.434	197.053	144.993	5619.16	267.959	937.84	138.798	113.481	118.302	537.422	580.135	126.321	663.3	115.454	109.094	1043.39	436.801	21.788	299.426	210.53	11.5821
LJA271	1751.29	451.803	1428.3	964.612	1122.59	537.272	837.494	2502.42	357.185	1593.95	294.379	1199.27	1107.4	933.374	1154.11	140.784	2175.69	127.457	1028.27	105.555	107.087	463.81	297.267	137.489	6908.43	532.074	246.872	269.147	103.154	134.283	142.129	3962.9	268.478	1434.22	98.9828	72.2517	74.143	467.139	901.67	133.119	339.81	101.751	96.144	1201.43	323.571	16.1758	351.967	427.369	12.0423
LJA272	1711.13	503.75	1827.39	872.331	1167.35	711.832	838.032	1644.94	547.528	1891.39	350.958	1440.01	1262.54	1074.8	988.974	121.225	1585.72	152.598	1174.79	114.195	123.344	530.348	397.395	216.485	8263.47	582.017	262.966	353.953	120.124	177.053	119.509	5180.83	321.065	1183.78	92.9592	107.261	106.398	505.063	616.54	153.043	482.766	76.4327	98.0348	1005.1	315.339	20.8648	396.533	449.483	39.7056
LJA273	1879.47	554.015	2071.75	1094.71	1372.61	578.919	940.297	1936.26	570.217	2008.93	383.291	1396.19	1211.62	1130.32	726.505	128.895	1257.58	156.164	1292.08	143.76	122.217	629.459	327.789	176.823	10546.8	535.955	274.46	317.555	115.261	98.1937	142.436	2583.1	268.916	1221.26	106.358	112.823	90.7259	562.422	688.352	157.836	326.052	106.463	137.408	1075.44	336.987	18.4522	335.18	583.437	87.0554
LJA274	1791.27	7476.76	1478.33	1321.76	1247.93	2387.42	856.499	279.103	1702.95	1045.52	586.851	800.55	706.552	521.059	456.224	546.79	1188.17	372.987	470.754	444.073	426.724	394.358	239.701	319.569	165.819	474.722	236.396	336.276	555.654	764.06	226.511	280.838	324.74	677.843	461.47	891.008	336.417	770.294	351.587	287.045	412.139	782.427	207.456	185.367	476.847	855.874	247.082	28.5532	2787.5
LJA276	2951.58	3489.9	2431.5	1644.19	1769.04	4530.22	1541.35	725.065	1318	2012.54	2038.84	1213.49	1126.01	1062.88	503.886	468.898	986.94	630.282	924.211	776.66	1107.07	643.439	365.822	2685.72	3820.02	740.847	487.882	592.623	649.875	307.039	585.635	211.857	342.309	469.521	325.718	619.166	387.533	342.272	339.05	411.268	456.349	466.784	577.669	243.792	451.811	563.352	399.247	188.223	4305.72
LJA277	3345.8	3789.43	2028.95	1786.06	1711.67	3351.65	1613.46	338.845	1112.41	1555.53	2511.28	1354.58	1178.21	941.436	632.567	338.904	1077.29	543.546	679.83	789.194	640.811	639.485	302.945	1476.01	1431.02	609.409	326.507	420.121	494.619	81.4376	481.425	168.153	295.427	460.979	261.322	474.522	283.239	318.8	374.82	323.529	364.291	346.295	799.872	156.522	346.396	162.524	223.816	195.906	6134.17
LJA278	3382.08	3910.49	2455.01	1951.53	1944.31	4043.77	1590.55	791.822	1253.79	1988.63	3632.2	1304.48	1102.58	1253.67	566.165	515.196	1163.51	639.961	906.737	665.907	1322.69	715.675	302.222	2817.95	3063.59	862.873	480.178	558.844	652.777	164.335	306.697	239.144	441.687	667.69	267.439	444.205	287.874	551.426	350.536	375.209	339.39	428.187	1056.07	226.917	315.731	140.891	276.732	224.234	8699.15
LJA279	3408.36	10429.4	2263.75	1521.68	1729.89	5851.97	1454.54	303.655	1327.84	1606.17	6607.19	1093.87	855.49	1136.77	854.468	78.8626	862.517	461.022	461.489	535.174	763.398	755.012	344.766	445.969	247.394	828.358	119.267	374.89	614.57	4.72327	125.654	145.232	1438.79	206.571	194.489	436.527	27.7461	447.342	199.502	335.805	448.59	488.432	1966.55	103.073	249.986	83.0673	270.652	98.1029	5257.58
LJA28	1088.86	748.943	622.169	661.38	798.637	156.164	618.257	189.504	1089.82	758.068	490.247	576.471	462.507	628.075	92.6913	73.4949	1074.35	314.346	445.804	198.907	330.316	184.923	489.661	374.661	143.815	452.135	135.328	656.01	357.12	6.53211	1868.15	567.752	849.19	360.142	721.228	197.172	49.2449	361.972	635.186	200.24	374.934	239.122	97.5492	191.664	152.348	33.1277	827.193	310.838	6.85186
LJA280	3635.26	2638.26	3206.87	2118.51	1585.45	4141.52	1528.44	235.688	1162.61	2217.94	3387.03	1276.04	1258.11	1519.21	527.846	408.479	1037.94	187.979	802.9	730.349	1160.85	760.211	115.269	117.21	59.4032	763.804	136.655	424.064	846.786	32.6195	253.201	148.467	343.758	708.523	128.73	606.159	196.375	735.199	420.069	365.48	509.305	629.537	929.994	246.37	440.513	257.475	222.278	51.9087	14099
LJA281	3273.07	3792	2002.5	1784.28	1558.14	3465.82	1474.2	364.797	1167.18	1500.99	4774.67	1171.32	1152.21	905.797	635.914	211.603	1122.74	657.516	645.13	668.972	724.374	652.721	285.782	1604.02	1772.81	644.999	296.78	422.297	514.537	4.68636	870.87	195.179	492.094	518.368	180.248	413.109	444.796	424.001	389.485	271.629	374.975	353.496	1531.61	179.896	300.016	116.283	233.621	225.717	3355.09
LJA282	6988.79	747.574	7011.89	4032.43	4129.25	296.564	3681.26	1005.64	1518.49	3645.59	230.938	3288.79	3234.07	2099.09	625.392	703.144	1011.23	1283.5	1050.26	1224.07	1684.84	1575.72	348.078	3600.73	5766.89	1330.41	243.373	515.325	642.514	5620.7	453.551	187.418	448.572	808.886	210.881	232.639	210.288	638.871	370.014	472.645	520.277	236.752	96.6855	357.12	448.195	578.068	356.503	123.436	51.7344
LJA283	5405.21	3699.98	2987.01	2714.76	2230.08	4192.91	2441.01	508.532	997.41	1866.97	4042.43	1843.61	1856.36	1449.45	520.753	343.88	1052.26	365.141	538.679	553.436	746.784	990.341	216.462	946.711	941.806	1122.31	206.967	347.178	941.729	17.5284	452.176	132.028	323.845	839.995	107.009	469.37	172.379	687.811	466.811	405.373	347.185	531.732	1301.3	274.445	612.832	188.807	154.444	138.771	13235.3
LJA284	9773.81	473.148	14235.3	5459.25	5997.45	321.683	3730.17	1265.95	2625.93	6530.16	234.394	3719.63	3985.49	3812.05	306.295	1079.14	1077.32	102.884	1638.95	1622.98	5254.16	1882.03	161.329	82.7471	14.3888	1801.91	198.226	594.098	809.524	6102.13	8.69436	253.73	950.344	1158.42	69.8594	208.004	142.684	733.908	320.74	595.657	616.531	241.112	77.049	595.58	289.371	1146.78	376.879	61.9176	14.5992
LJA285	8162.5	630.253	10526.8	4820.7	5254.19	369.553	4049.25	1311.52	2177.76	5017.8	339.049	3314.11	3418.87	3108.16	450.542	955.578	1002.14	147.966	1375.63	1306.84	3706.83	1760.06	244.176	2107.79	2937.13	1822.87	275.99	562.417	679.671	5338.75	139.766	191.317	563.43	833.854	137.007	187.024	174.242	546.228	308.767	558.692	471.51	213.493	127.961	438.918	309.626	565.479	318.475	75.563	17.2714
LJA286	6641.84	685.209	8783.87	4223.73	4518.08	381.969	3222.54	791.589	1704.29	3995.75	262.033	2979.44	3273.15	2373.6	572.998	1197.51	1021.2	152.744	1026.5	1343.39	2676.77	1567.71	449.234	609.891	723.833	1344.91	314.807	506.528	584.759	4712.31	87.8962	179.897	463.167	672.73	135.21	204.905	296.187	497.492	380.301	432.437	395.688	226.429	94.6191	299.856	309.318	372.577	274.043	73.5593	20.7943
LJA287	2781.39	5503.92	1474.77	1641.19	1813.96	2376.55	1486.29	2141.78	2062.02	914.818	1468.37	1254.17	1030.31	1033.34	2412.62	1309.99	1139.73	406.794	527.584	402.981	505.657	764.007	3755.6	482.746	336.473	873.849	1464.35	797.991	543.61	14.8608	223.157	178.062	413.39	336.967	555.124	267.906	296.244	260.371	533.58	348.802	515.898	197.223	429.068	225.624	348.711	129.046	414.885	449.723	21.6097
LJA288	3125.13	1966.66	3914.42	1473.09	2758.11	1297.36	1503.58	683.995	2921.5	2373.45	1301.44	1269.92	1532.24	1476.34	78.5971	1147.32	855.669	106.191	856.856	642.866	875.781	906.895	408.795	122.272	11.043	772.445	141.879	366.897	454.065	6497.12	46.2053	770.354	334.456	424.844	180.297	334.904	154.995	681.839	211.778	297.888	221.007	268.229	378.045	175.52	437.707	258.485	275.213	131.539	568.013
LJA289	3853.94	5936.79	2348.69	1661.05	2048.02	4656.49	1456.26	173.978	1394.97	1585.91	3790.01	1229.26	752.732	1336.57	1006.82	376.473	835.74	0.915549	535.339	640.772	977.806	682.794	1819.28	0.121968	0.0548272	917.4	96.7001	356.278	415.104	1.14958	0.208239	392.175	1053.66	170.416	11.3265	358.246	0.0342625	175.781	155.315	298.982	422.327	149.003	957.472	113.939	183.369	117.825	220.4	143.948	168.953
LJA290	4772.56	933.475	4700.18	2436.01	2982.1	272.802	1831.51	1356.4	2023.9	2896.65	527.119	2413.3	1871.82	1787.71	172.568	1232.15	2250.57	83.3836	996.964	928.376	1088.21	1178.11	607.022	71.3915	398.202	600.224	295.407	279.3	362.396	5352.61	74.0727	604.295	199.485	479.293	173.122	246.876	152.338	519.024	348.952	231.649	303.884	373.931	180.815	211.751	391.993	313.916	383.542	113.912	73.2206
LJA291	5353.9	6431.44	2225.36	1730.39	2421.26	3257.05	2205.51	215.668	1307.89	1569.76	4140.16	1992.2	1043	1056.66	622.233	114.998	1046.52	125.676	449.159	705.228	495.731	1106.76	276.473	121.854	41.5601	989.919	123.986	238.642	448.818	78.1177	43.3103	165.826	483.351	206.6	110.468	331.803	87.3816	247.142	316.526	305.387	295.658	218.227	1235.64	85.8876	217.611	67.1914	153.695	115.345	1068.74
LJA292a-LJA159	3218.02	2186.17	1608.54	1806.16	1818.83	737.145	1642.55	479.986	1054.7	973.567	499.774	1454.69	1203.16	777.131	932.349	824.235	342	1782	614.735	654.173	453.8	596.506	1603.59	1446.99	1010.63	622.349	791.058	649.976	486.404	75.2442	234.343	214.004	348.037	220.431	524.775	300.491	263.299	346.524	215.394	304.376	428.349	188.758	134.247	134.185	314.229	83.5183	306.712	238.785	109.55
LJA293-LJA160	2605.07	1652.67	3818.02	1875.7	2067.42	1359.64	1399.94	967.33	1678.71	2305.51	309.621	1090.72	1114.46	1638.19	360.478	1413.62	683.584	48.4583	612.328	536.73	698.264	942.021	191.94	58.2761	38.7643	659.472	421.072	482.431	428.758	2037.52	35.6659	469.206	421.848	368.89	435.943	492.241	25.6744	574.812	177.073	401.874	522.037	266.59	69.7099	276.535	438.693	459.097	251.792	147.053	338.838
LJA294-LJA161	3512.31	5472.48	2679.99	1634.94	2080.07	565.46	1627.62	267.187	1145.5	1834.95	410.023	1598.62	1671.62	840.202	230.116	292.416	842.444	992.176	847.594	819.348	826.452	669.715	968.276	692.613	139.09	603.819	681.492	523.947	1044.26	290.272	294.485	304.617	976.889	345.467	297.811	1217.59	746.883	466.601	255.441	456.302	352.571	647.354	109.121	137.903	1014.23	771.292	491.688	299.978	74.1081
LJA295	6065.85	2520.19	5357.47	4253.1	3405.29	757.971	2545.94	922.572	1823.75	3442.5	776.061	2694.03	3024.46	1891.56	549.201	320.579	848.376	2544.05	1830.29	1596.93	1406.7	1554.31	2967.95	1323.66	124.16	919.268	287.746	469.784	881.6	28.538	789.779	253.687	309.834	275.4	276.439	384.704	928.373	249.252	404.588	599.751	230.087	307.858	269.08	146.502	599.129	61.8154	365.046	338.36	43.7326
LJA296	4471.14	1708.13	4541.55	2986.4	2315.94	922.608	1644.08	1007.6	1679.77	2632.02	717.731	1659.42	1877.4	1901.44	530.596	323.22	618.652	2146.89	2093.71	1379.68	1335.15	1097.09	2223.76	1891.76	132.32	878.055	577.253	730.902	760.034	11.0393	719.076	275.645	377.359	165.273	322.888	276.334	1390.95	170.108	402.579	507.3	243.739	204.518	187.379	93.7604	252.951	94.3345	339.311	195.472	19.5928
LJA32	1652.72	477.401	1336.99	1566.05	1540.17	423.721	1170.75	274.928	1334.19	978.22	856.256	1386.33	780.434	769.323	236.341	184.112	1213.34	34.4109	819.268	412.986	529.365	496.061	113.239	56.2719	8.17165	589.595	41.9723	557.02	606.958	64.6845	388.476	444.147	427.101	232.153	396.653	442.791	62.6585	350.93	396.926	296.013	289.32	327.837	235.42	152.082	439.737	95.7093	1461.9	77.7126	16.6109
LJA38	4865.04	2281.51	3283.75	2554.4	2662.88	1171.78	2594.97	1029.31	2155.22	1934.21	1094.43	2070.1	1927.79	2182.22	133.638	1215.44	593.828	461.225	512.898	334.571	875.603	1226.92	1276.49	518.757	94.1553	1561.39	1071.28	594.576	938.361	5246.58	169.165	337.913	579.872	571.475	212.464	314.86	119.133	1203.91	266.576	331.3	258.869	196.482	300.003	305.368	610.655	261.864	361.153	365.861	525.27
LJA48	1641.45	1546.18	2318.97	940.485	1278.34	242.977	851.883	360.945	1131.62	927.939	565.737	1034.4	630.533	381.003	298.582	889.409	634.378	107.116	554.78	463.942	201.483	314.416	294.515	86.2441	19.9376	350.173	157.986	431.596	456.238	18.9486	75.1106	154.235	1057.54	342.085	540.769	967.848	181.75	601.057	262.009	338.258	1419.54	576.628	205.862	181.795	541.437	234.256	394.207	103.346	10.5987
LJA81	1627.26	2126.05	1412.95	921.182	1054.74	56.0755	857.07	247.547	2671.66	1785.09	160.679	747.218	695.893	773.408	29.1734	30.2488	1456.5	40.5009	699.9	383.632	591.039	343.652	402.965	20.9769	4.17739	644.885	63.6447	692.928	523.757	5.02829	1773.57	646.321	691.183	500.747	611.937	270.496	34.8381	343.669	628.125	244.232	352.176	346.346	41.7505	303.095	299.969	16.6626	955.255	334.524	4.28396
LJA96	1861.22	2207.6	1265.51	862.043	1160.61	76.2418	875.21	225.77	2357	1878.8	255.22	824.095	617.072	872.129	46.523	40.3797	1218.15	316.373	685.209	338.936	690.143	330.086	508.047	224.887	44.5935	648.735	81.9611	641.244	530.522	6.61452	1747.58	534.371	755.685	409.928	640.291	251.796	131.631	319.446	635.825	248.963	343.745	341.758	43.8185	245.771	228.827	25.8936	783.15	241.85	3.65408
[truncated: 4,951 more columns]
