# Supplementary material for: Constructing a comprehensive gene co-expression based interactome in Bos taurus
Source: PeerJ. 2017 Dec 4;5:e4107. doi: 10.7717/peerj.4107 (PMC5719962; doi:10.7717/peerj.4107)
Supplement: Table S7 [file peerj-05-4107-s008.xlsx]

## Sheet: sub_node_cat
Gene	Type
HSF1	terminal
FBXO18	terminal
ASXL2	terminal
CASP8AP2	terminal
ERGIC2	linker
AAAS	linker
CAPRIN1	linker
ARL2BP	linker
DNTTIP1	terminal
CERS4	terminal
CERS5	terminal
CERS2	terminal
BHLHE41	terminal
CCDC96	linker
BCLAF1	terminal
PPP2R4	linker
CBFB	terminal
DRAP1	terminal
BRCA1	terminal
DHX9	terminal
DDIT3	terminal
DDX3X	terminal
CASZ1	terminal
CENPB	terminal
DFFB	terminal
CCDC79	terminal
CCDC153	linker
CENPW	terminal
CENPT	terminal
CARHSP1	terminal
DDX41	terminal
ARID1B	terminal
APP	terminal
AKAP8	terminal
AKAP9	terminal
AHR	terminal
CHTF8	terminal
DDX1	terminal
EME1	terminal
ARID1A	terminal
EME2	terminal
ADNP	terminal
GBA	linker
ALG6	linker
DTD1	terminal
POLR1B	terminal
DEK	terminal
FEN1	terminal
GLYR1	terminal
SWAP70	terminal
CHD3	terminal
ASXL1	terminal
CHD8	terminal
BACH1	terminal
EXO1	terminal
SLC35A5	linker
FBXL19	terminal
FOS	terminal
CHRAC1	terminal
ARID2	terminal
BLM	terminal
RECQL	terminal
APTX	terminal
CR2	terminal
STAT1	terminal
ATOX1	linker
DNAJC1	terminal
DNAJC2	terminal
APITD1	terminal
GIT1	linker
AIFM2	terminal
AGO4	linker
AIFM1	terminal
FAM134C	linker
CXorf56	linker
AGFG1	terminal
ANKRD13B	linker
EEPD1	terminal
CLYBL	linker
GPBP1	terminal
BRIP1	terminal
FUS	terminal
CSDC2	terminal
DHX58	terminal
ERCC6L	terminal
CDT1	terminal
AKAP8L	terminal
C10orf10	linker
TGFBR2	linker
ASH1L	terminal
FAM214A	linker
BDP1	terminal
HMGA1	terminal
BBX	terminal
ATXN10	linker
CARF	terminal
G3BP1	terminal
ARNT	terminal
ALB	terminal
ABT1	terminal
BANF1	terminal
CXXC1	linker
CIC	terminal
CRISPLD2	linker
ERCC2	terminal
CEP55	linker
ERCC6	terminal
GEN1	terminal
F13A1	linker
BAZ2B	terminal
BIN3	linker
DNA2	terminal
ANKRD1	terminal
AXIN1	linker
CALCOCO1	linker
APEX1	terminal
APEX2	terminal
CNOT3	linker
ADNP2	terminal
DNMT3A	terminal
CRYZ	terminal
FAM196A	linker
EBF3	terminal
EBF1	terminal
ATG4D	linker
DEDD	terminal
E2F6	terminal
E2F5	terminal
C1D	terminal
EBP	linker
EPM2AIP1	terminal
EGR3	terminal
ATF4	terminal
BCL6	terminal
DEDD2	terminal
BCL3	terminal
